# Supplementary material
Source: Research Square preprint supplement (doi:10.21203/rs.3.rs-9103127/v1)
Supplement: Supplementary file 1 [file f60209364456bc47ea4a82e2.docx]

Living Pore-Expansion in Two-dimensional Porous Frameworks with Single-atom Precision and Tailored Functionality

Yang Zong,a Run-Tan Gao,a Ting-Ting Li,a Hai-Xu Tong,b Shixing Lei,c Jia Tian,c Na Liu,*,b Zhan-Ting Li,c and Zong-Quan Wu*,a

*a* State Key Laboratory of Supramolecular Structure and Materials, College of Chemistry, Jilin University, Changchun 130012, Jilin Province, China. E-mail: zqwu@jlu.edu.cn

*b* The School of Pharmaceutical Sciences, Jilin University, Changchun 130021, Jilin Province, China. E-mail: [liuna606@jlu.edu.cn](mailto:liuna606@jlu.edu.cn)

*c* State Key Laboratory of Organometallic Chemistry and Shanghai-Hongkong Joint Laboratory in Chemical Synthesis, Shanghai Institute of Organic Chemistry, University of Chinese Academy of Sciences, Chinese Academy of Sciences, Shanghai 200032, China.

**Table of Contents**

**General considerations** ··········································································· S3-S4

**Synthetic procedures** ·············································································· S4-S6

**Enzyme immobilization Studies** ································································ S6-S8

**Table S1** Characterization data for MOFms and CPF30 ············································· S9

**Figure S1**XPS date of MOF0 ········································································ S10

**Figures S2-S10** NMR and FT-IR date of MOFms ············································ S10-S14

**Figures S11-S12.** DLS curves of MOFms ··························································· S15

**Figure S13** SAXS profiles of MOFms ······························································· S16

**Figures S14-15** Nitrogen sorption isotherms of MOFms ···································· S16-S17

**Figure S16** XPS date of MOF10 ······································································ S17

**Figure S17** AFM image of MOF10 ·································································· S17

**Figures S18-21.** NMR and FT-IR spectra of MOFms ········································ S18-S19

**Figure S22.** DLS curve of CPF30 ···································································· S20

**Figure S23** DSC date of CPF30 ······································································· S20

**Figures S24-29** Enzymes immobilization ···················································· S20-S22

**References** ····························································································· S23

**General considerations**

1. **Measurements**

Nuclear magnetic resonance (NMR) spectra were recorded using a Bruker 400 or 500 MHz spectrometer {H} operated in the Fourier Transform mode. Chemical shifts are reported in delta (*d*) units and expressed in parts per million (ppm) downfield from tetramethylsilane (TMS) using the residual solvent proton as an internal standard. 13C solid state NMR spectra were obtained using a Bruker Avance III model 400 MHz NMR spectrometer at a MAS rate of 5 kHz. Fourier transform infrared (FT-IR) spectra were recorded at ambient temperature on a FT-IR instrument (VERTEX 80V) using KBr pellets. Dynamic light scattering (DLS) was recorded using a Nano-ZS 90 Zetasizer of Malvern instrument. The X-ray photoelectron spectroscopy (XPS) was collected in a KRATOS, Axis UltraDLD, equipped with Al *Kα* ray source (hν = 1486.6 eV) at high vacuum of 9.8 × 10-10 Torr. Powder X-ray diffraction (PXRD) was performed on the Rigaku Smartlab X-ray diffractometer with Cu-*K*α radiation, 40 kV, 200 mA with a step of 0.01. Structural modeling and Pawley refinements were performed using Materials Studio suite of programs, subsequently, obtained the stacking models of the frameworks and their corresponding lattice cell parameters. The models were firstly constructed based on the coarsely theoretical structure. All the eclipsed and staggered stacking models were geometrically optimized with the Forcite molecular dynamics module. Pawley refinement module was applied to obtain the lattice cell parameters. Transmission electron microscopy (TEM) was performed on a JEM-2100F operating at 200 kV accelerating voltage, and was used for low-magnification and high-resolution transmission electron microscopy (HR-TEM) imaging. Elemental analysis data were collected in Vario micro cube from Agilent. The small angel X-ray scattering (SAXS) data were collected on BL16 at the Shanghai Synchrotron Radiation Facility with a wavelength of 0.1033 nm (energy 12 keV) and a beam size of 0.30 × 0.05 (H × V) mm2. The sample concentration is 10.0 mg mL-1, and the exposure time is 30 second. Atomic force microscope (AFM) was performed on a Cypher S microscope (Oxford Instruments, Asylum Research). The Brunauer Emmett-Teller (BET) method was utilized to calculate the specific surface areas on a Micromeritics ASAP 2020 Adsorption Analyzer using volumetric technique. Before measurement, the samples were degassed under vacuum at 80 °C for 12 h. Thermogravimetric analysis (TGA) was performed under a nitrogen atmosphere at a heating rate of 10 °C min-1 from 30 to 800 °C using a Waters Corporation instrument. Differential scanning calorimetric (DSC) measurements were carried on a Mettler-Toledo DSC821e instrument. Samples were first heated from 25 to 250 °C at a heating rate of 10 °C min-1 under nitrogen atmosphere. Utraviolet-visible (UV-vis) absorption spectra were recorded on PerkinElmer UV/vis double beam spectrophotometer in a 1.0 cm quartz cell at 25 °C.

**2. Materials**

All solvents were obtained from Sinopharm. Co. Ltd., and were purified by standard procedures before use. In the experiments that required dry solvents, such as tetrahydrofuran (THF), toluene, chloroform (CHCl3), and dichloromethane (CH2Cl2) were dried using standard methods and distilled before use. All chemicals were purchased from Aladdin, Sinopharm, and Sigma-Aldrich Chemical Co. Ltd., and were used as received otherwise denoted. Lysozyme and cellulase were purchased from Aladdin Biochemical Technology (Shanghai, China). The monomer **1** was prepared according to reported literatures and the structure was confirmed by 1H NMR.[1-3]

**3.** **Synthetic procedures**

*Synthesis of MOF0.*Under an inert atmosphere, 1,3,5-triethynylbenzene (TEB, 0.13 mmol, 0.020 g) and *trans*-bis(triethyl phosphine) palladium dichloride (0.20 mmol, 0.082 g) were dissolved in triethylamine (Et3N, 30 mL) and 1,4-diethylene dioxide (30 mL) in the presence of copper(I) chloride (0.013 mmol, 1.3 mg) as catalyst. The mixture was stirred at room temperature for 48 h. After filtration, the afforded powder was washed with acetonitrile, *N*,*N*-dimethylacetamide (DMF), and water in turn and dried under a vacuum, to give MOF0 as a white crystalline powder (73 mg, 83%). FT-IR (KBr, 25 °C, cm–1): 2962 (*ν*C-H), 2877 (*ν*C-H), 2109 (*ν*C≡C), 1569 (*ν*C=C, aromatic). 13C *ss*-NMR: *δ* 208.8, 190.8, 129.3, 111.6, 111.6, 18.5, 9.6. Anal. Calcd (%) for C20H32P2Pd: C, 54.49; H, 7.32. Found (%): C, 54.41; H, 7. 41. The BET surface area (m2 g-1) was measured as 134.4 m2 g-1 at 77 K with N2 on a Micromeritics ASAP 2020 Adsorption Analyzer using volumetric technique.

*Synthesis of* *pore-expanded MOFms.* Taking MOF10 as an example. Under N2 atmosphere, MOF0 catalyst (8.0 mg, 0.012 mmol) was added to the degassed solution of monomer **1** (52.1 mg, 0.18 mmol) in CHCl3 (2 mL) ([**1**]0/[Pd]0 = 10, [**1**]0 = 0.09 M). After stirred at 55 °C for 12 h, thin layer chromatography analysis indicated monomer **1** was completely consumed. Then, the solvent was removed by evaporation under reduced pressure. The residue was redissolved in a small amount of CH2Cl2 then the precipitated into a large amount of methanol. The precipitated solid was isolated via centrifugation and dried under vacuum to afford pore-expanded MOF10 as a yellow solid (36.2 mg, 71% yield). 1H NMR (400 MHz, CDCl3, 25 °C): *δ* 7.46–7.21 (br, 2H, ArH), 5.84–5.63 (br, 2H, ArH), 4.58–3.52 (br, 2H, OCH2), 1.71–0.70 (br, 19H, CH2 and CH3). 13C NMR: *δ* 165.0, 162.6, 150.4 129.7, 127.3, 117.1, 64.9, 31.9, 29.7, 28.6, 26.0, 22.7, 14.1. 31P NMR (202 MHz, CDCl3) *δ* 16.10. FT-IR (KBr, 25 °C, cm–1): 2940 (*ν*C-H, aromatic), 2923 (*ν*C-H, aromatic), 2853 (*ν*C-H, aromatic), 2160 (*ν*C≡C), 1716 (*ν*C=O), 1595 (*ν*C=N). Anal. Calcd(%) for C200H282N10O20P2Pd: C, 72.46; H, 8.58. Found (%): C, 72.51; H, 8.53. The BET surface area (m2 g-1) was measured as 115.3 m2 g-1 at 77 K with N2 on a Micromeritics ASAP 2020 Adsorption Analyzer using volumetric technique.

The MOF20, MOF30, and MOF40 were prepared followed the similar procedure described above. The characterization data are showed below.

MOF20 (73% yield). 1H NMR (400 MHz, CDCl3, 25 °C): *δ* 7.53–7.06 (br, 2H, ArH), 5.99–5.43 (br, 2H, ArH), 4.26–3.71 (br, 2H, OCH2), 1.82–0.70 (br, 19H, CH2 and CH3). 31P NMR (202 MHz, CDCl3) *δ* 15.84. FT-IR (KBr, 25 °C, cm–1): 2968 (*ν*C-H, aromatic), 2929 (*ν*C-H, aromatic), 2852 (*ν*C-H, aromatic), 2197 (*ν*C≡C), 1721 (*ν*C=O), 1601 (*ν*C=N). Anal. Calcd(%) for C380H532N20O40P2Pd: C, 73.74; H, 8.67. Found (%): C, 73.82; H, 8.73. The BET surface area (m2 g-1) was measured as 89.7 m2 g-1 at 77 K with N2 on a Micromeritics ASAP 2020 Adsorption Analyzer using volumetric technique.

MOF30 (79% yield). 1H NMR (400 MHz, CDCl3, 25 °C): *δ* 7.48–7.13 (br, 2H, ArH), 5.85–5.50 (br, 2H, ArH), 4.43–3.51 (br, 2H, OCH2), 1.95–0.62 (br, 19H, CH2 and CH3). 31P NMR (202 MHz, CDCl3) *δ* 15.83. FT-IR (KBr, 25 °C, cm–1): 2964 (*ν*C-H, aromatic), 2930 (*ν*C-H, aromatic), 2850 (*ν*C-H, aromatic), 1722 (*ν*C=O), 1601 (*ν*C=N). Anal. Calcd(%) for C560H782N30O60P2Pd: C, 74.21; H, 8.70. Found (%): C, 74.12; H, 8.71. The BET surface area (m2 g-1) was measured as 74.4 m2 g-1 at 77 K with N2 on a Micromeritics ASAP 2020 Adsorption Analyzer using volumetric technique.

MOF40 (69% yield). 1H NMR (400 MHz, CDCl3, 25 °C): *δ* 7.45–7.15 (br, 2H, ArH), 5.86–5.41 (br, 2H, ArH), 4.54–3.39 (br, 2H, OCH2), 1.98–0.61 (br, 19H, CH2 and CH3). 31P NMR (202 MHz, CDCl3) *δ* 15.76. FT-IR (KBr, 25 °C, cm–1): 2960 (*ν*C-H, aromatic), 2930 (*ν*C-H, aromatic), 2854 (*ν*C-H, aromatic), 1722 (*ν*C=O), 1597 (*ν*C=N). Anal. Calcd(%) for C740H1032N40O80P2Pd: C, 74.46; H, 8.72. Found (%): C, 74.51; H, 8.79. The BET surface area (m2 g-1) was measured as 31.6 m2 g-1 at 77 K with N2 on a Micromeritics ASAP 2020 Adsorption Analyzer using volumetric technique.

*Synthesis of* *CPFms.*Taking CPF30 as an example, MOF30 (96.8 mg, 0.007 mmol, 1.0 eq.) and Wei-phos (31.4 mg, 0.053 mmol, 5.0 eq. to Pd), and CuI (1.3 mg, 0.007 mmol, 1.0 eq.) were dissolved in THF (10.0 mL) and Et3N (10.0 mL) in a 100 mL oven-dried flask under N2 atmosphere. After the reaction solution was stirred at 55 °C overnight, it was cooled to room temperature and the solvent was removed by evaporation under reduced pressure. The crude product was redissolved in a small amount of THF, and then precipitated into a large amount of methanol. The precipitated solid was collected via filtration to obtain CPF30 as a light-yellow solid (69.9 mg, 76% yield). 1H NMR (400 MHz, CDCl3, 25 °C): *δ* 7.40–7.21 (br, 2H, ArH), 5.95–5.55 (br, 2H, ArH), 4.52–3.59 (br, 2H, OCH2), 1.71–0.74 (br, 19H, CH2 and CH3). 13C NMR: *δ* 164.0, 161.6, 149.3 128.6, 126.2, 116.1, 63.9, 30.9, 29.7, 28.6, 27.6, 25.0, 13.1, 21.7. FT-IR (KBr, 25 °C, cm–1): 2951 (*ν*C-H), 2925 (*ν*C-H), 2110 (*ν*C≡C), 1722 (*ν*C=O), 1605 (*ν*C=N). Anal. Calcd(%) for C274H376N15O30: C, 75.48; H, 8.69. Found (%): C, 75.52; H, 8.74. The BET surface area (m2 g-1) was measured as 76.3 m2 g-1 at 77 K with N2 on a Micromeritics ASAP 2020 Adsorption Analyzer using volumetric technique.

**4.** **Enzyme****immobilization**

Taking Lys as an example: MOF10 (10 mg) was added to Lys solution (0.02 mM) in phosphate buffer (PBS, 0.01 M, pH = 7.4). The resulting suspension was slowly stirred at room temperature. To calculate the content of the encapsulated lysozyme, UV-vis spectroscopy was used to measure the decline in absorption at 280 nm at different time intervals until adsorption saturation was achieved (*Ab*) and following formula was used.[4]

In this formula, *Q* represent the adsorbing mass of Lys (mg) per milligram of MOFms, and *M* is the molar mass of lysozyme.

The encapsulation of cellulase (CE) was performed following the same procedure.

**5. Enzyme activity**

*Measurement of Lys activity.*Dried *M. lysodeikticus* cell wall (9.0 mg) was dissolved in 30 mL potassium phosphate buffer (0.1 M, pH 7.0) solution. The cell wall suspension (2.9 mL) was poured into a cuvette and incubated at 25 ℃ for 5 min. Free Lys and Lys@MOFms of 1 mg protein, were dissolved in 1 ml phosphate buffer (pH 7) and added to the cuvette. Absorbance at 450 nm was then recorded. One unit of activity of lysozyme is defined as the decrease in the absorbance at 450 nm of 0.001 min-1 at pH 7.0 and 25 °C using *M. lysodeikticus* cells as a substrate.

*pH optimization assay of* *Lys@MOF10*: The optimum pH for Lys activity was studied over a pH range of 3 to 10 to determine the activity of free as well as encapsulated enzyme. Citrate buffer (pH 3-6), phosphate buffer (pH 7-8), and bis–tris propane buffer (pH 6.3-10) were used to determine the activity. The stability was determined by preincubating the enzyme for 30 min at 37 ℃ in various buffers. After incubation, the residual enzyme activity (%) was measured using phosphate buffer (0.1 M, pH 7.0).

*Kinetics of* *CE@MOF20*. The catalytic activities and Michaelis-Menten constants (*K*m) of the encapsulated CE@MOF20 were determined on *p*NPGlc dissolved in 10 mM 4-(2-hydroxyethyl)piperazine-*L*-ethanesulfonic acid (HEPES) buffer, pH 7.0. The activity of the encapsulated CE@MOF20 was measured. As this reaction follows zero-order kinetics (enzyme saturation), 10 mg of CE@MOF20 were incubated with HEPES buffer (90 µL, 10 mM, pH 7.0) containing different concentrations of *p*NPGlc (1, 2, 5, 10, 20, 40, 50, 60, and 70 mM) at 70 °C for 5 min under constant shaking at 800 rpm on a Thermomixer. The reaction was stopped by adding 100 µL stop solution (0.4 M glycine, pH 10.8). Then, the reaction product was diluted 20X, and the absorbance was measured at 405 nm. The amount of product generated was calculated by comparing it to a standard curve.

*Recycling assay of* *CE@MOF20*. The recycled activity was measured on the chromogenic substrate, *p*NPGlc. For recycling assays, a 100 *μ*L reaction mixture containing 10 mg of CE@MOF20 and 40 mM of *p*NPGlc (final concentration) was incubated at 70 °C for 5 min with constant shaking at 800 rpm. To precipitate the CE@MOF20, the reaction content was centrifuged at 10000 rpm for 10 min, and the supernatant was decanted. The *p*NP in the supernatant was quantified by measuring absorbance at 405 nm by UV-visible spectrophotometry. The CE@MOF20 was reused for another product forming reaction up to five cycles to compare the catalytic efficiency between the first and the later cycles.

*Temperature assay of CE@MOF20*. The catalytic activity of the CE@MOF20 was determined on *p*NPGlc at 70 °C after different intervals (0.5, 1, 1.5, 2, 2.5, 3, 3.5, 4 h). 10 mg of CE@MOF20 was incubated with HEPES buffer (90 *µ*L, 10 mM, pH 7) containing *p*NPGlc (40 Mm, 90 *µ*L) at 70 °C for different time under constant shaking at 800 rpm in a Thermomixer. The reaction was stopped by adding 100 *µ*L stop solution (0.4 M glycine, pH 10.8). Then, the reaction product was diluted 20X, and absorbance was measured at 405nm. The *p*NP generated was calculated by comparing it with a standard curve.

**Table S1.** Characterization data for MOFms and CPF30 *a*

| Run | Frameworks | *SBET b*(m2 g-1) | *V*pore *b* (cm3 g-1) | *d*pore *b* (nm) |
| --- | --- | --- | --- | --- |
| 1 | MOF0 | 134.4 | 0.212 | 2.0 |
| 2 | MOF10 | 115.3 | 0.221 | 4.3 |
| 3 | MOF20 | 89.7 | 0.193 | 6.6 |
| 4 | MOF30 | 74.4 | 0.155 | 9.6 |
| 5 | MOF40 | 31.6 | 0.145 | 15.0 |
| 6 | CPF30 | 76.3 | 0.156 | 9.3 |

*a* The frameworks were prepared according to Scheme 1 in main text. *b* Surface area (*SBET*), pore volume (*V*pore), and pore-diameter (*d*pore) were calculated from nitrogen adsorption and desorption data using the DFT and BJH method.

**Figure S1.** XPS survey of MOF0.

**Figure S2.** 31P NMR (122 MHz) spectra of MOF10 measured in CDCl3 at 25 °C.

**Figure S3.** 13C NMR(125 MHz) spectrum of MOF10 measured in CDCl3 at 25 °C.

**Figure S4.** FTIR spectra of (a) MOF20, (b) MOF30, and (c) MOF40 measured at room temperature using KBr.


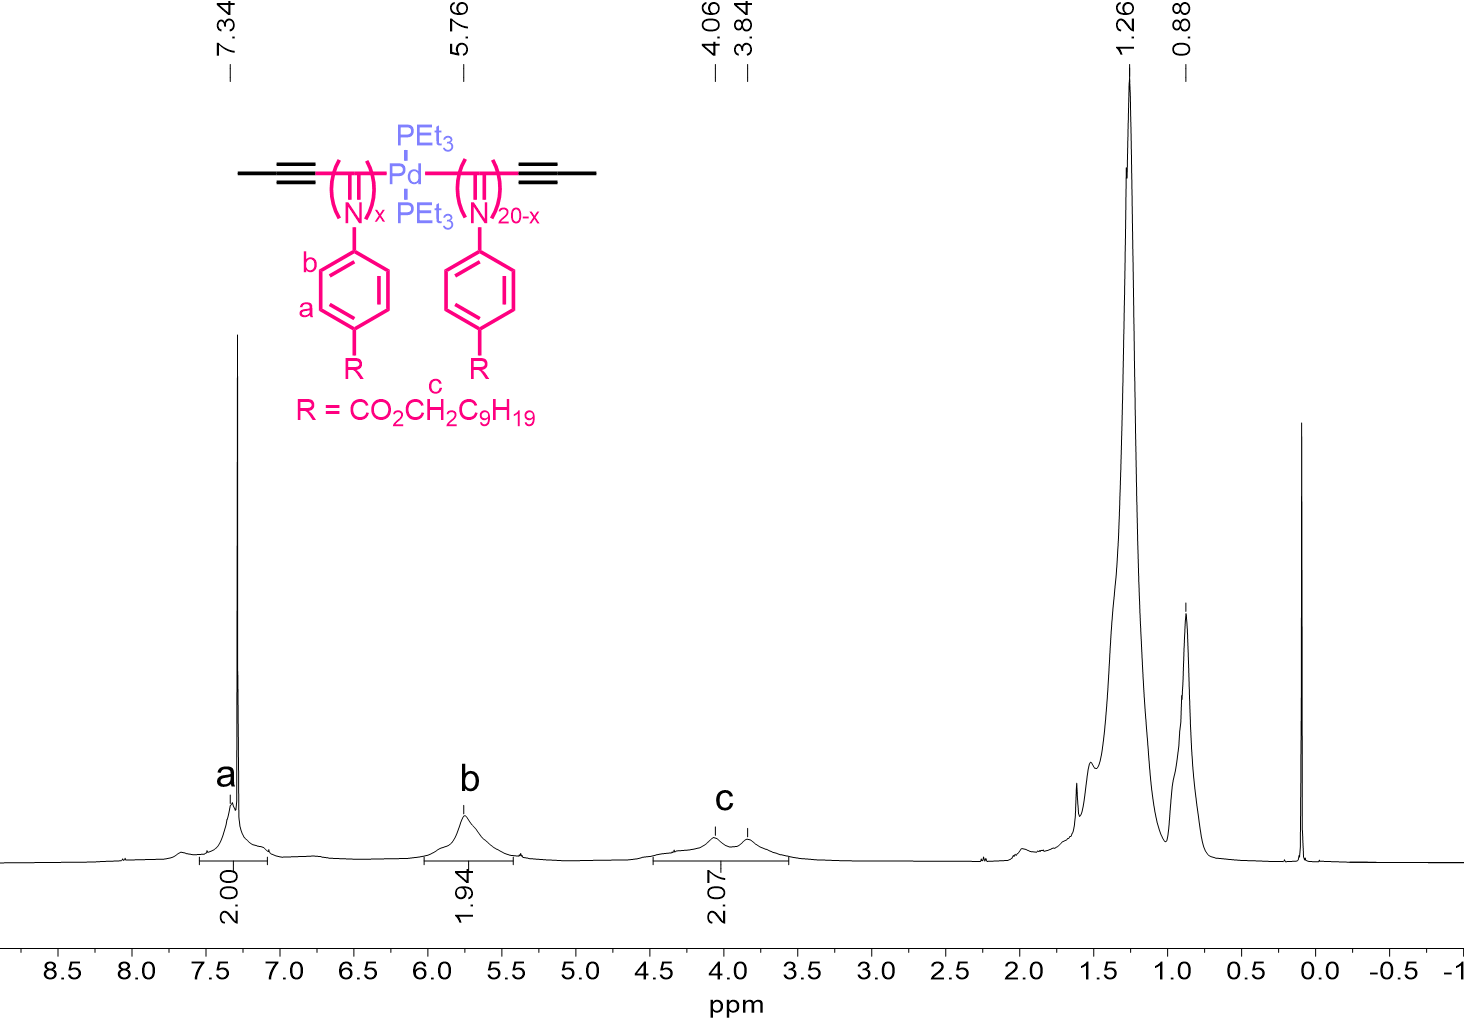


**Figure S5.** 1H NMR (500 MHz) spectrum of MOF20 measured in CDCl3 at room temperature.

**Figure S6.** 31P NMR (122 MHz) spectra of MOF20 measured in CDCl3 at room temperature.


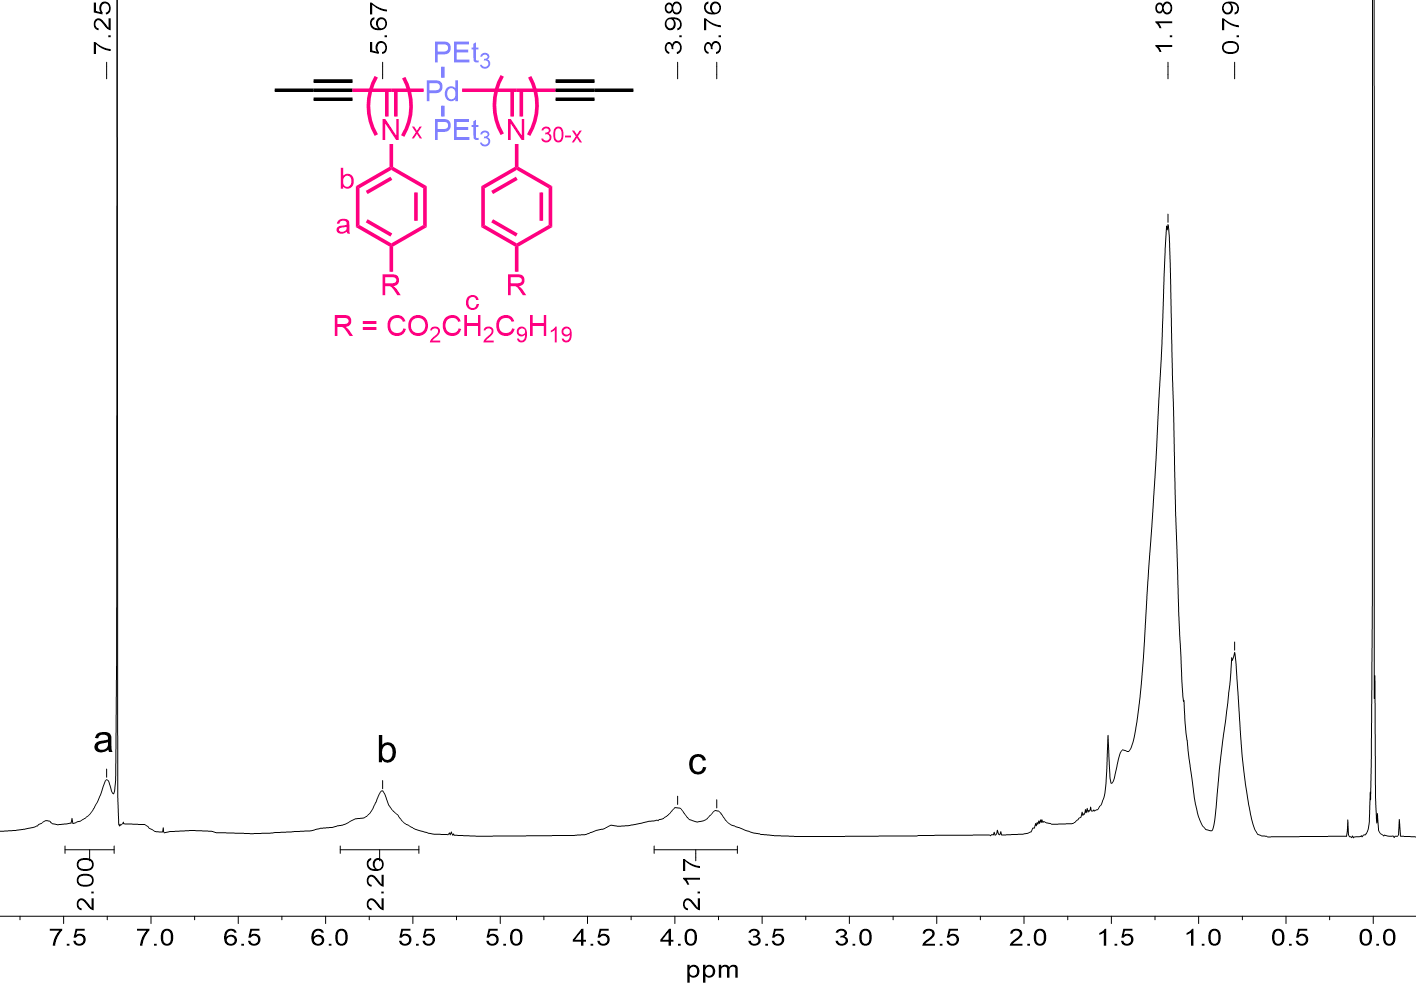


**Figure S7.** 1H NMR (500 MHz) spectrum of MOF30 measured in CDCl3 at room temperature.

**Figure S8.** 31P NMR (122 MHz) spectra of MOF30 measured in CDCl3 at room temperature.


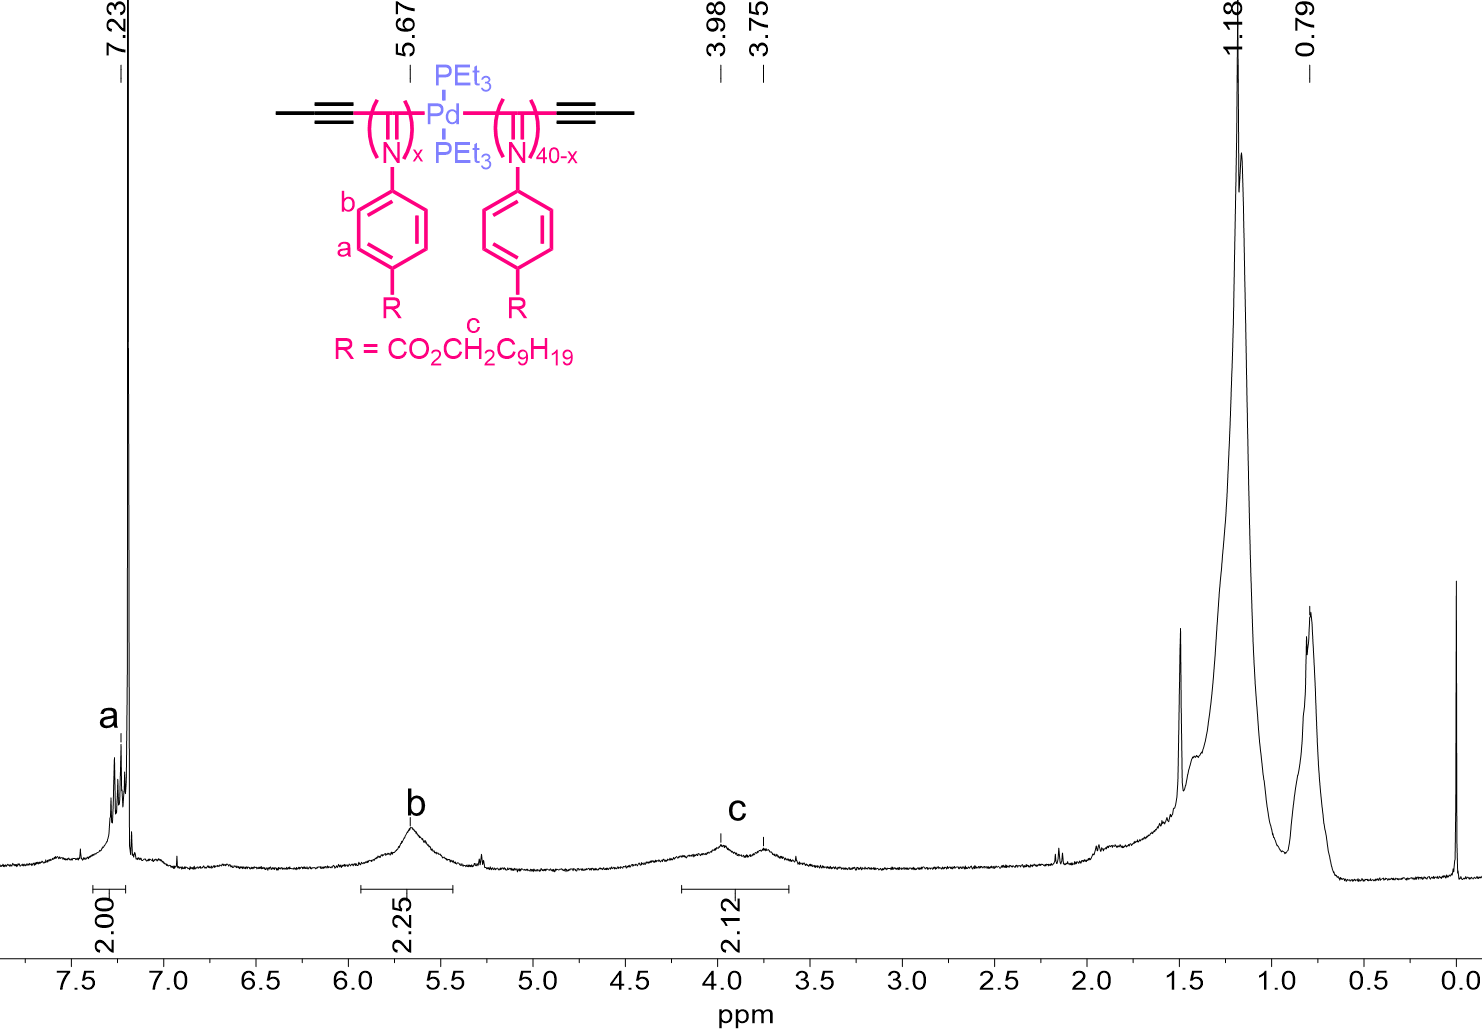


**Figure S9.** 1H NMR (500 MHz) spectrum of MOF40 measured in CDCl3 at room temperature.

**Figure S10.** 31P NMR (122 MHz) spectra of MOF40 measured in CDCl3 at room temperature.

**Figure S11.** (a) DLS curves of (a) MOF10, (b) MOF20, (c) MOF30, and (d) MOF40 with different concentrations (CHCl3, 25 °C).

**Figure S12.** Hydrodynamic diameters (*D*H) of MOFms in CHCl3 at different concentrations determined by DLS at 25 °C.


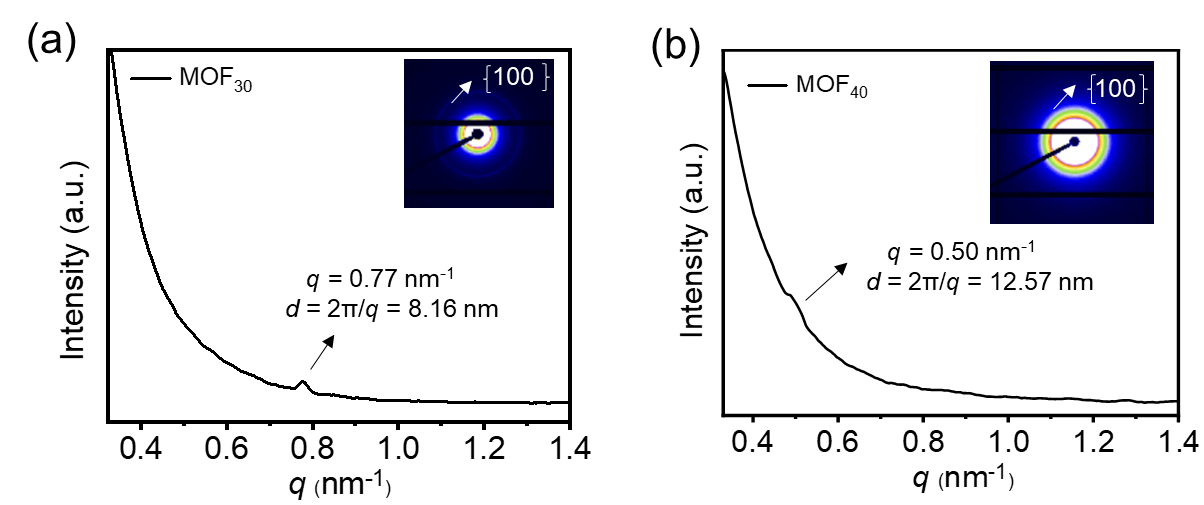


**Figure S13.** Solution-phase synchrotron SAXS profiles of MOF30 (a) and MOF40 (b) recorded in CHCl3 (10 mg mL-1).


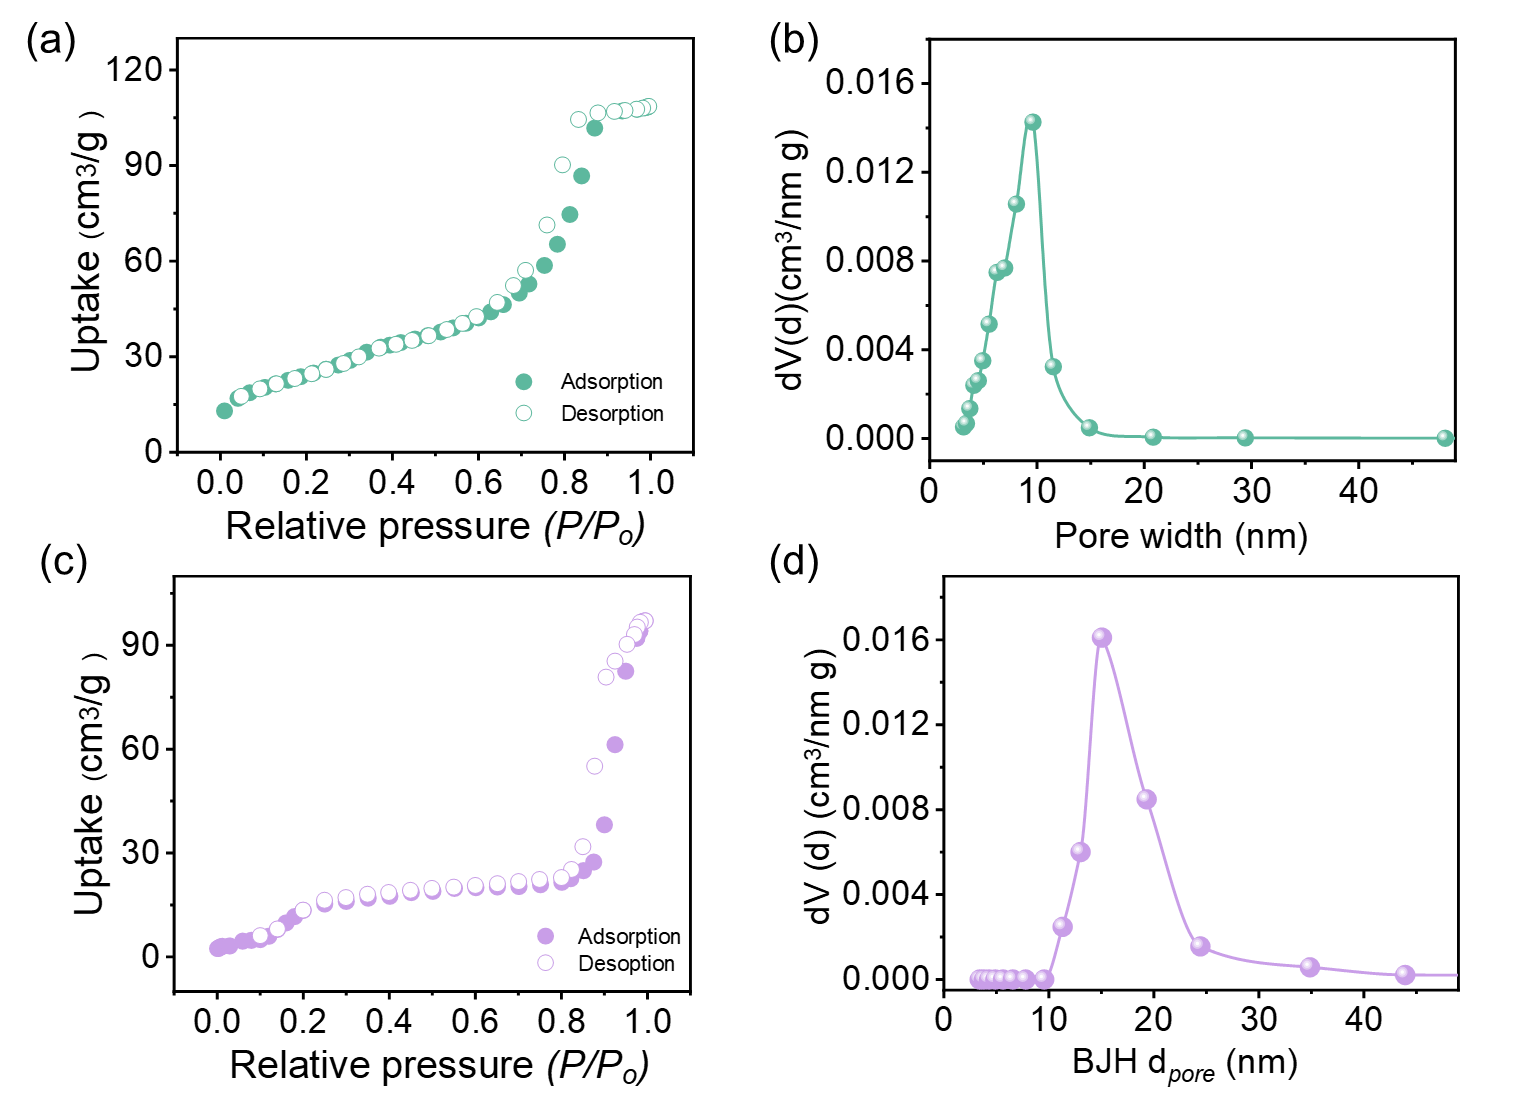


**Figure S14.** Nitrogen sorption isotherms (a, c) and pore size distribution (b, d) of MOF30 (a, b) and MOF40 (c, d) recorded at 77 K.

**Figure S15.** Plots of the *V*pore of MOFms *vs*. DP of the polyisocyanide backbone of the synthesized MOFms.

**Figure S16.** XPS survey of MOF10.


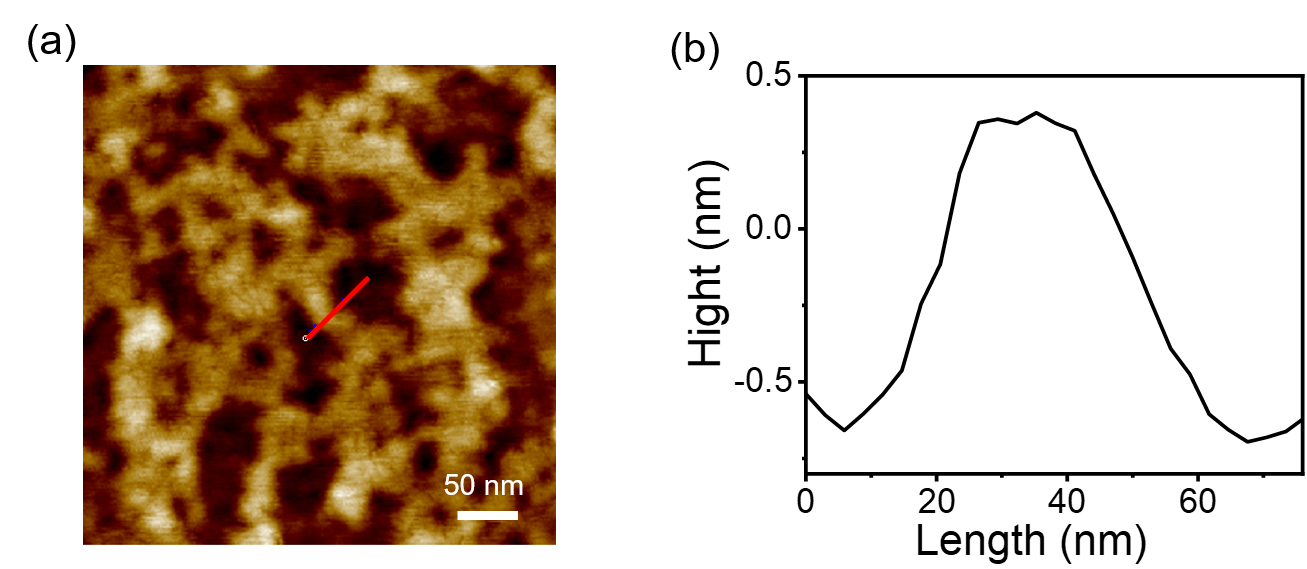


**Figure S17.** (a) AFM image of MOF10. (b) The height profile along the length of the line in the image as depicted by the red line in (a).

**Figure S18.** 1H NMR (500 MHz) spectrum of CPF30 measured in CDCl3 at room temperature.

**Figure S19.** FT-IR spectra of CPF30 measured at room temperature using KBr.

**Figure S20.** 13C NMR(125 MHz) spectrum of CPF30 measured in CDCl3 at room temperature.

**Figure S21.** 31P NMR (202 MHz) spectra ofMOF30 and CPF30 recorded in CDCl3 at room temperature.

**Figure S22.** DLS profiles of MOF30 (0.2 mg mL-1) and CPF30 (0.2 mg mL-1) in CHCl3 at room temperature.

**Figure S23.** DSC curves of MOF30 and CPF30 measured at a heating rate of 10 °C min-1 under N₂ atmosphere.


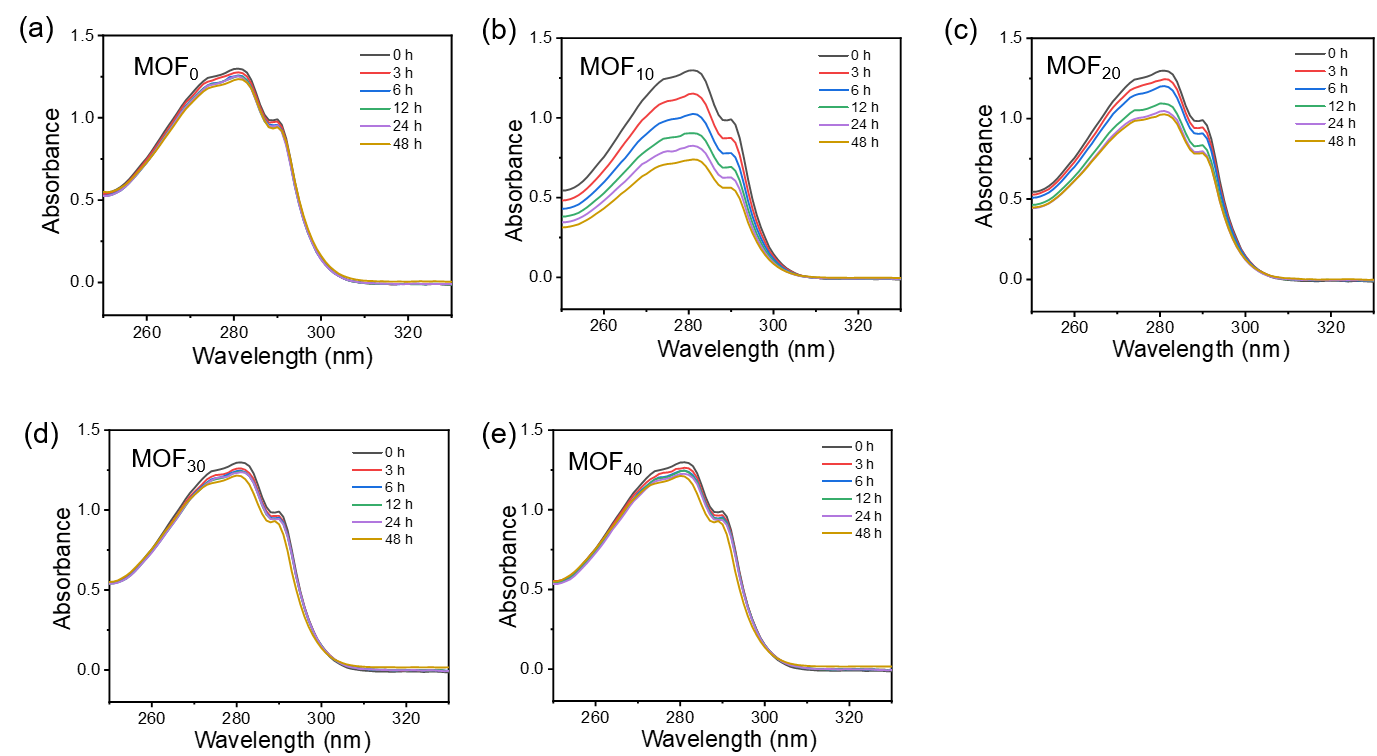


**Figure S24.** Time-dependent UV-vis spectra of Lys encapsulated by MOF0 (a), MOF10 (b), MOF20 (c), MOF30 (d) and MOF40 (e), respectively in PBS (0.01 M, pH = 7.4) at 25 °C.

**Figure S25.** Relative activity of free Lys and Lys@MOFms measured using M. lysodeikticus cells as a substrate.

**Figure S26.** Relative activity of free Lys and Lys@MOF10 in buffer with different pH values, measured using *Micrococcus lysodeikticus* cells as the substrate.

**Figure S27.** Standard curve of *p*NPGlc assay performed at 25 °C in HEPES buffer with pH 7.0.

**Figure S28.** The half-life of CE@MOF20 (a) and free cellulase (b) after storage at 70 ℃ in HEPES buffer with pH 7.0.

**Figure S29.** The relative stability of free CE and CE@MOF20 after storage at 25 ℃ in HEPES buffer with pH 7.0.

**References**

1. Wu, Z.-Q., Nagai, K., Banno, M., Okoshi, K., Onitsuka, K. & Yashima, E. Enantiomer-Selective and Helix-Sense-Selective Block Copolymerization of Isocyanide Enantiomers Initiated by Single-Handed Helical Poly(phenyl isocyanide)s. *J. Am. Chem. Soc.* **131**, 6708–6718 (2009).
2. Xue, Y.-X., Zhu, Y.-Y., Gao, L.-M., He, X.-Y., Liu, N., Zhang, W.-Y., Yin, J., Ding, Y., Zhou, H. & Wu, Z.-Q. Air-Stable (Phenylbuta-1,3-diynyl)palladium(II) Complexes: Highly Active Initiators for Living Polymerization of Isocyanides. *J. Am. Chem. Soc.* **136**, 4706–4713 (2014).
3. Liu, N., Gao, R.-T. & Wu, Z.-Q. Helix-Induced Asymmetric Self-Assembly of π-Conjugated Block Copolymers: From Controlled Syntheses to Distinct Properties. *Acc. Chem. Res.* **56**, 2954–2967 (2023).
4. Deng, H., Grunder, S., Cordova, K. E., Valente, C., Furukawa, H., Hmadeh, M., Gandara, F., Whalley, A. C., Liu, Z., Asahina, S., Kazumori, H., O’Keeffe, M., Terasaki, O., Stoddart, J. F. & Yaghi, O. M. Large-Pore Apertures in a Series of Metal-Organic Frameworks. *Science* **336**, 1018–1023 (2012).
